# Supplementary material for: Repair after nephron ablation reveals limitations of neonatal neonephrogenesis
Source: JCI journal article supplement (doi:10.1172/jci.insight.88848), 2017-01-25
Supplement: sd1 [file 1]

## Technique of acid maceration

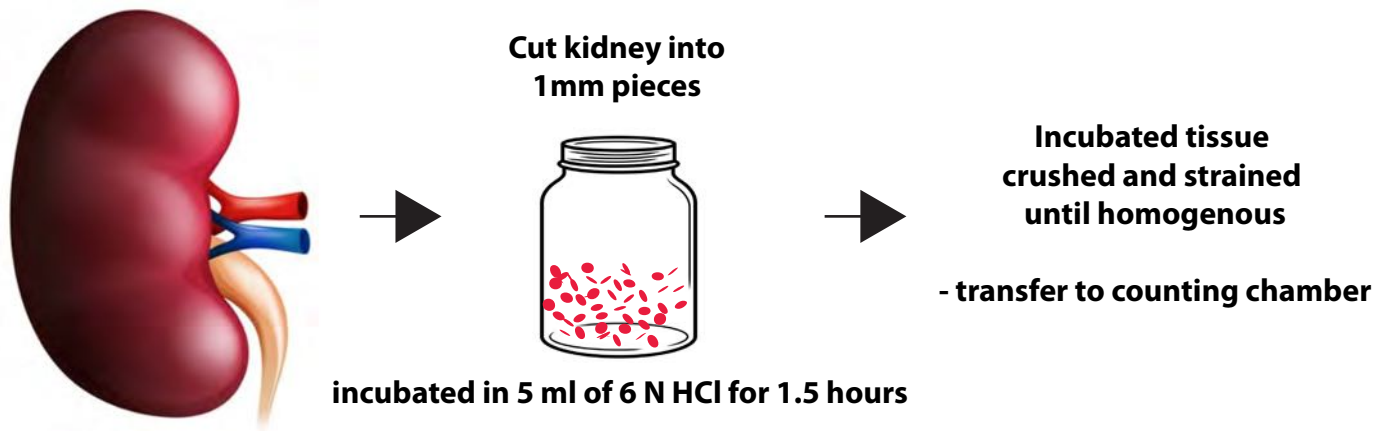

Acid macerated kidney high power field

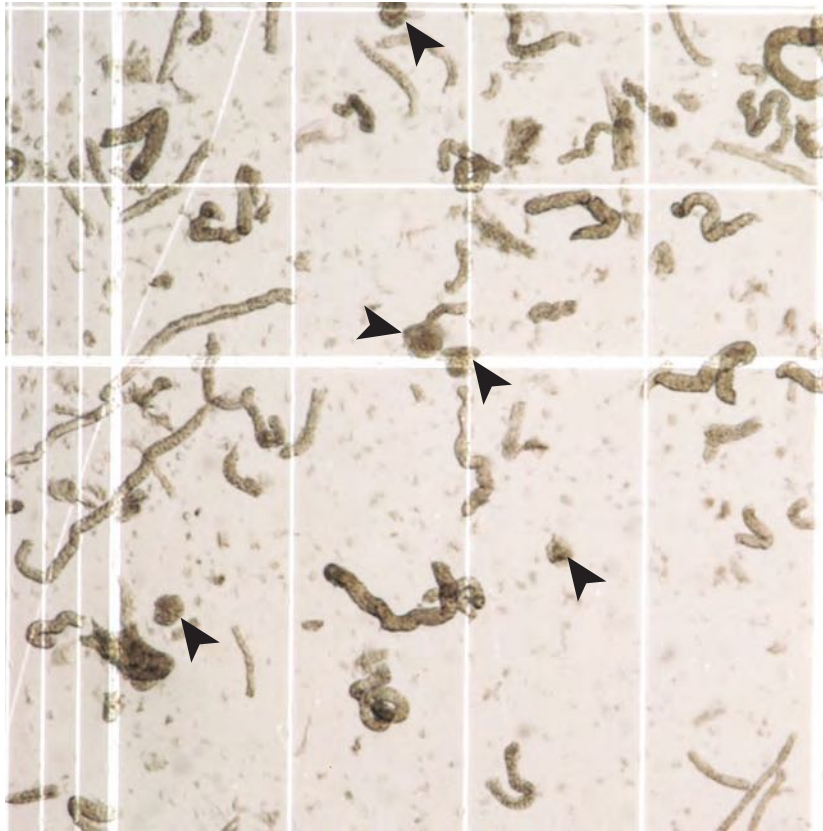

Supplemental Figure 1. Acid maceration technique.

Fresh kidney tissue is minced and incubated in acid until sufficient dispersion into small particles is complete. Above is an example of the data collected during counting. Glomeruli are counted based on size and appearance on high power field (arrowheads) in a Neubauer counting chamber.
